# Supplementary material for: Predicting the future direction of cell movement with convolutional neural networks
Source: PLoS One. 2019 Sep 4;14(9):e0221245. doi: 10.1371/journal.pone.0221245 (PMC6726366; doi:10.1371/journal.pone.0221245)
Supplement: S1 Table — (CSV) [file pone.0221245.s005.csv]

Dimension	Feature Description
1	Texture_AngularSecondMoment_gray_3_00
2	Texture_AngularSecondMoment_gray_3_01
3	Texture_AngularSecondMoment_gray_3_02
4	Texture_AngularSecondMoment_gray_3_03
5	Texture_Contrast_gray_3_00
6	Texture_Contrast_gray_3_01
7	Texture_Contrast_gray_3_02
8	Texture_Contrast_gray_3_03
9	Texture_Correlation_gray_3_00
10	Texture_Correlation_gray_3_01
11	Texture_Correlation_gray_3_02
12	Texture_Correlation_gray_3_03
13	Texture_DifferenceEntropy_gray_3_00
14	Texture_DifferenceEntropy_gray_3_01
15	Texture_DifferenceEntropy_gray_3_02
16	Texture_DifferenceEntropy_gray_3_03
17	Texture_DifferenceVariance_gray_3_00
18	Texture_DifferenceVariance_gray_3_01
19	Texture_DifferenceVariance_gray_3_02
20	Texture_DifferenceVariance_gray_3_03
21	Texture_Entropy_gray_3_00
22	Texture_Entropy_gray_3_01
23	Texture_Entropy_gray_3_02
24	Texture_Entropy_gray_3_03
25	Texture_InfoMeas1_gray_3_00
26	Texture_InfoMeas1_gray_3_01
27	Texture_InfoMeas1_gray_3_02
28	Texture_InfoMeas1_gray_3_03
29	Texture_InfoMeas2_gray_3_00
30	Texture_InfoMeas2_gray_3_01
31	Texture_InfoMeas2_gray_3_02
32	Texture_InfoMeas2_gray_3_03
33	Texture_InverseDifferenceMoment_gray_3_00
34	Texture_InverseDifferenceMoment_gray_3_01
35	Texture_InverseDifferenceMoment_gray_3_02
36	Texture_InverseDifferenceMoment_gray_3_03
37	Texture_SumAverage_gray_3_00
38	Texture_SumAverage_gray_3_01
39	Texture_SumAverage_gray_3_02
40	Texture_SumAverage_gray_3_03
41	Texture_SumEntropy_gray_3_00
42	Texture_SumEntropy_gray_3_01
43	Texture_SumEntropy_gray_3_02
44	Texture_SumEntropy_gray_3_03
45	Texture_SumVariance_gray_3_00
46	Texture_SumVariance_gray_3_01
47	Texture_SumVariance_gray_3_02
48	Texture_SumVariance_gray_3_03
49	Texture_Variance_gray_3_00
50	Texture_Variance_gray_3_01
51	Texture_Variance_gray_3_02
52	Texture_Variance_gray_3_03
